# Supplementary material for: Effective combination treatment of GD2-expressing neuroblastoma and Ewing's sarcoma using anti-GD2 ch14.18/CHO antibody with Vγ9Vδ2+ γδT cells
Source: PubMed Central journal article supplement (PMC4760299; doi:10.1080/2162402x.2015.1025194), 2015-04-27

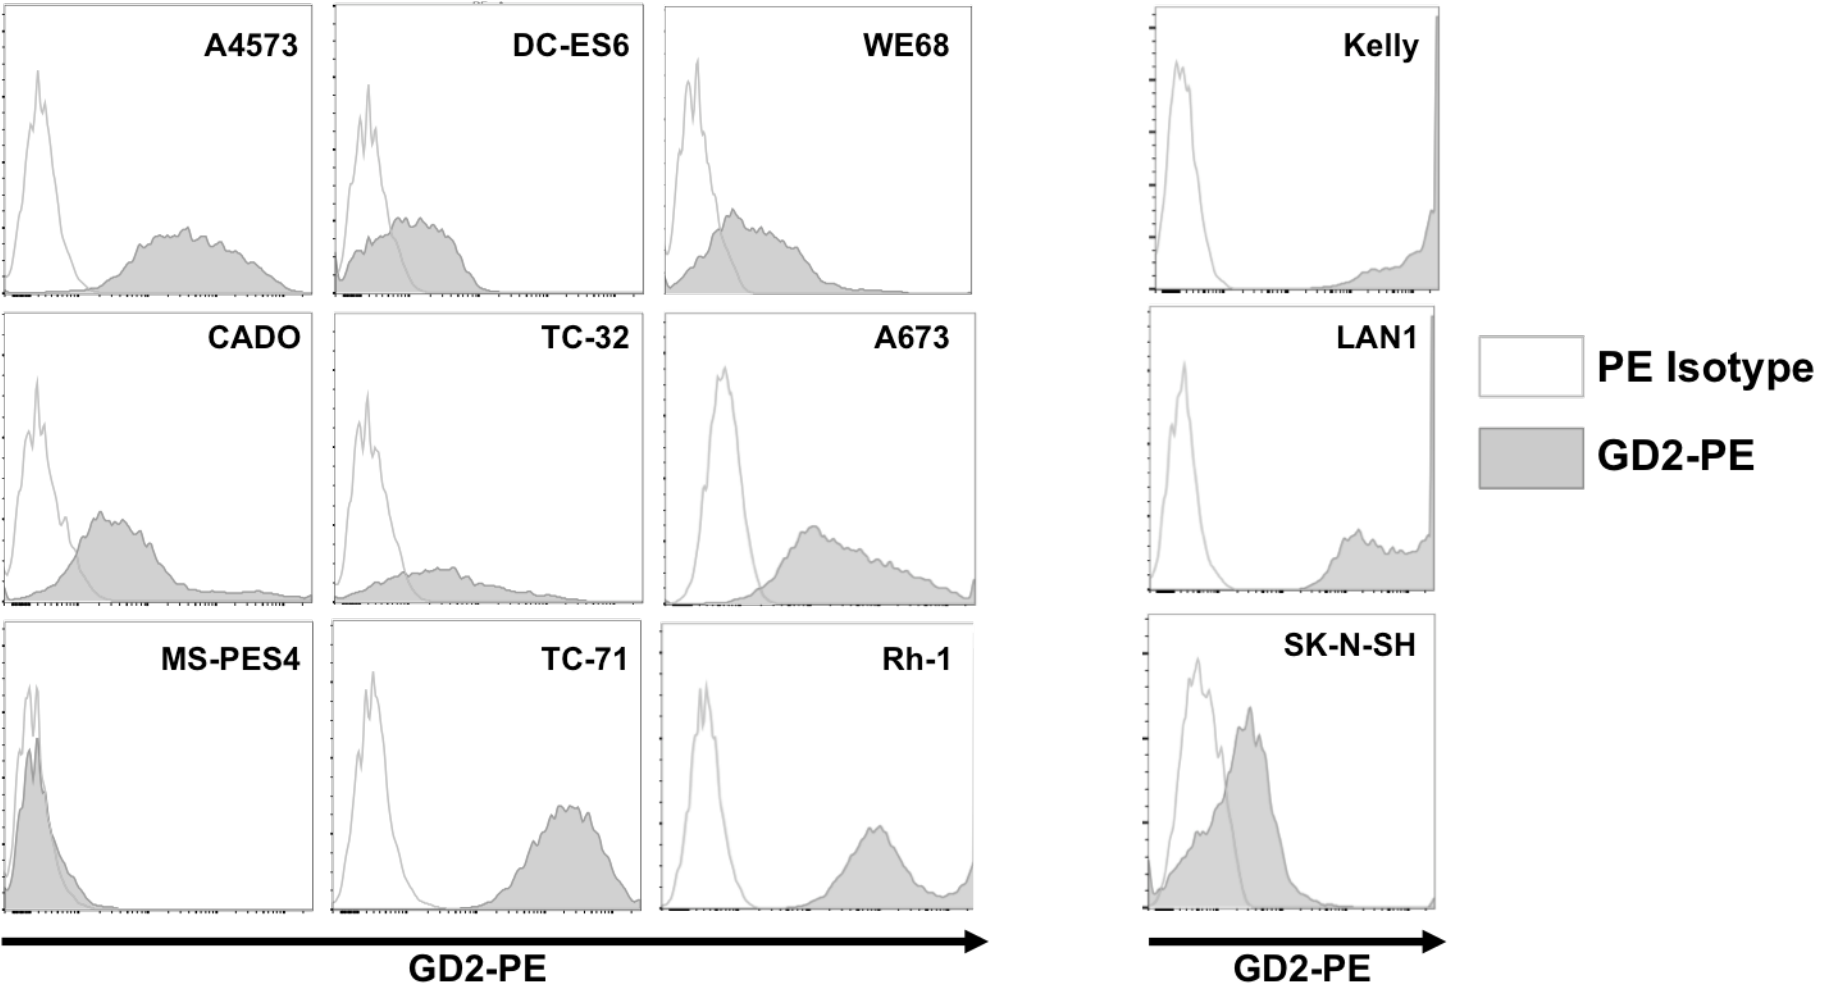

Supplement: koni-05-01-1025194-s001.pdf [file koni-05-01-1025194-s001.pdf]
